# (Supplementary file 2)

## Research project

### Determination of the Status of Tuberculosis in La Esperanza prison in Guaduas municipality, (Cundinamarca - Colombia).

CONFIDENTIALITY: The data provided to the National University of Colombia - Bogotá Headquarter, are confidential and may not be used for commercial purposes, taxation or judicial investigation.

#### Questionnaire 1. Detection of inmates with respiratory symptoms

Date: (Day)   (Month)   (Year)

Interviewer's complete name:

#### 1. General information

|                                                                                         |  |  |                                                                                                                                      |                                                                                                   |                   |                                                           |                |                        |                                                                           |  |          |                                                                      |  |  |                                                                        |  |  |
|-----------------------------------------------------------------------------------------|--|--|--------------------------------------------------------------------------------------------------------------------------------------|---------------------------------------------------------------------------------------------------|-------------------|-----------------------------------------------------------|----------------|------------------------|---------------------------------------------------------------------------|--|----------|----------------------------------------------------------------------|--|--|------------------------------------------------------------------------|--|--|
| 1. Inmate ID number in study:                                                           |  |  |                                                                                                                                      |                                                                                                   |                   |                                                           |                |                        |                                                                           |  |          |                                                                      |  |  |                                                                        |  |  |
| 2. Inmate complete name and surname:                                                    |  |  |                                                                                                                                      |                                                                                                   |                   |                                                           |                |                        |                                                                           |  |          |                                                                      |  |  |                                                                        |  |  |
| 3. Identification document:                                                             |  |  |                                                                                                                                      |                                                                                                   |                   | <input type="checkbox"/> (No ID)                          |                |                        | <input type="checkbox"/> (Colombian ID)                                   |  |          | <input type="checkbox"/> (ID of another country)                     |  |  | 4. Age:                                                                |  |  |
| ID number: _____                                                                        |  |  |                                                                                                                                      |                                                                                                   |                   |                                                           |                |                        |                                                                           |  |          |                                                                      |  |  |                                                                        |  |  |
| 5. Jail ID number:                                                                      |  |  |                                                                                                                                      | 6. Security Level:                                                                                |                   |                                                           |                | 7. Block number: _____ |                                                                           |  |          |                                                                      |  |  |                                                                        |  |  |
|                                                                                         |  |  |                                                                                                                                      | <input type="checkbox"/> Minimum <input type="checkbox"/> Medium <input type="checkbox"/> Maximum |                   |                                                           |                |                        |                                                                           |  |          |                                                                      |  |  |                                                                        |  |  |
| 8. According to your culture, town or physical features, how do you recognize yourself? |  |  | <input type="checkbox"/> White.                                                                                                      |                                                                                                   |                   | <input type="checkbox"/> Indígena                         |                |                        | <input type="checkbox"/> Mestizo                                          |  |          | <input type="checkbox"/> Rom                                         |  |  | <input type="checkbox"/> Raizal                                        |  |  |
|                                                                                         |  |  | <input type="checkbox"/> Palenquero.                                                                                                 |                                                                                                   |                   | <input type="checkbox"/> Negro, mulato, afrodescendiente. |                |                        | <input type="checkbox"/> Other, ¿Which? _____                             |  |          |                                                                      |  |  |                                                                        |  |  |
| 9. ¿How long have you been in this jail?                                                |  |  | <input type="checkbox"/> Less than a month                                                                                           |                                                                                                   |                   | ¿number of days? _____                                    |                |                        | <input type="checkbox"/> 1 moth or more                                   |  |          | ¿number of months? _____                                             |  |  |                                                                        |  |  |
| 10. Within his current sentence, have you been in another jail?                         |  |  | <input type="checkbox"/> NO                                                                                                          |                                                                                                   |                   | <input type="checkbox"/> yes                              |                |                        | How long have you held in the other jail? (en meses): _____               |  |          |                                                                      |  |  |                                                                        |  |  |
| 11. Before this imprisonment, have you ever been imprisoned?                            |  |  | <input type="checkbox"/> NO                                                                                                          |                                                                                                   |                   | <input type="checkbox"/> yes                              |                |                        | <b>How long were you incarcerated?</b>                                    |  |          | <input type="checkbox"/> Less than a month, number of day? ____ days |  |  | <input type="checkbox"/> 1 moth or more, number of months? ____ months |  |  |
| 12. In what city or municipality you lived before being incarcerated:                   |  |  |                                                                                                                                      |                                                                                                   |                   | 13. What was your last year of study completed?: _____    |                |                        |                                                                           |  |          |                                                                      |  |  |                                                                        |  |  |
| 14. What occupation did you have before being incarcerated?                             |  |  | <b>Occupation</b>                                                                                                                    |                                                                                                   |                   |                                                           |                |                        | YES                                                                       |  | NO       |                                                                      |  |  |                                                                        |  |  |
|                                                                                         |  |  | Health worker (medical staff, nursing, bacteriology, physiotherapy, autopsies, pathologists, infectious diseases and pulmonologists) |                                                                                                   |                   |                                                           |                |                        |                                                                           |  |          |                                                                      |  |  |                                                                        |  |  |
|                                                                                         |  |  | Worker in enclosed or crowded places (prisons, army, long-term institutions for the care of the elderly)                             |                                                                                                   |                   |                                                           |                |                        |                                                                           |  |          |                                                                      |  |  |                                                                        |  |  |
|                                                                                         |  |  | Work with mining, exploitation of quarries, construction of tunnels or with many metallic minerals                                   |                                                                                                   |                   |                                                           |                |                        |                                                                           |  |          |                                                                      |  |  |                                                                        |  |  |
|                                                                                         |  |  | Work exposed to the inhalation of dust - Asbestos - (fabrics, cardboard, automobiles and installations containing asbestos)          |                                                                                                   |                   |                                                           |                |                        |                                                                           |  |          |                                                                      |  |  |                                                                        |  |  |
|                                                                                         |  |  | Work with toxic chemicals such as acid, alcohols, solvents, glue for shoes.                                                          |                                                                                                   |                   |                                                           |                |                        |                                                                           |  |          |                                                                      |  |  |                                                                        |  |  |
|                                                                                         |  |  | Other works, Which:                                                                                                                  |                                                                                                   |                   |                                                           |                |                        |                                                                           |  |          |                                                                      |  |  |                                                                        |  |  |
|                                                                                         |  |  | No occupation                                                                                                                        |                                                                                                   |                   |                                                           |                |                        |                                                                           |  |          |                                                                      |  |  |                                                                        |  |  |
| 15. Affiliation with the Social Security Health System (Mark with an X)                 |  |  | Contributive Regime                                                                                                                  |                                                                                                   | Subsidized Regime |                                                           | Not affiliated |                        | Special Regime (Army, Police, National University, ECOPETROL, Magisterio) |  | (SISBEN) |                                                                      |  |  |                                                                        |  |  |

|                                                                                                         |                                   |                                             |
|---------------------------------------------------------------------------------------------------------|-----------------------------------|---------------------------------------------|
| 16. Name of the Administrative Entity of Benefit Plans to which it belongs. For more ease ask about EPS | <input type="checkbox"/> CAPRECOM | <input type="checkbox"/> Other? Which _____ |
|---------------------------------------------------------------------------------------------------------|-----------------------------------|---------------------------------------------|

## 2. Clinical background of TB

|                                                                                                                                                    |                                                                                                          |                                                                                                                                                                                                                                                                                                                                                                                                                                                                                                                                                                               |
|----------------------------------------------------------------------------------------------------------------------------------------------------|----------------------------------------------------------------------------------------------------------|-------------------------------------------------------------------------------------------------------------------------------------------------------------------------------------------------------------------------------------------------------------------------------------------------------------------------------------------------------------------------------------------------------------------------------------------------------------------------------------------------------------------------------------------------------------------------------|
| 17. Have you had cough of any duration recently?                                                                                                   | <input type="checkbox"/> NO<br>Go to 21                                                                  | <input type="checkbox"/> yes<br>How many days in a row does this cough take? <input type="text"/> <input type="text"/><br>Answer questions 18, 19 and 20                                                                                                                                                                                                                                                                                                                                                                                                                      |
| 18. The cough is accompanied by phlegm, catarrh, or expectoration?                                                                                 | <input type="checkbox"/> NO                                                                              | <input type="checkbox"/> yes<br>How many days do you have phlegm? <input type="text"/> <input type="text"/><br>catarrh, or expectoration?                                                                                                                                                                                                                                                                                                                                                                                                                                     |
| 19. What is the color of phlegm or expectoration?<br><input type="checkbox"/> White <input type="checkbox"/> Yellow <input type="checkbox"/> Green | 20. Did the phlegm or expectoration have blood? <input type="checkbox"/> NO <input type="checkbox"/> yes |                                                                                                                                                                                                                                                                                                                                                                                                                                                                                                                                                                               |
| 21. Do you have or have you had any contact with someone diagnosed with tuberculosis?                                                              | <input type="checkbox"/> Does not know                                                                   | <p style="text-align: center;"><b>Who was that person?</b></p> <p>Was the contact with an inmate in the same cell?    <input type="checkbox"/> YES    <input type="checkbox"/> NO</p> <p>Is the contact or was it with an inmate inside the jail?    <input type="checkbox"/> YES    <input type="checkbox"/> NO</p> <p>Is the contact or was it with a visitor (family member)?    <input type="checkbox"/> YES    <input type="checkbox"/> NO</p> <p>Is the contact or was it before being incarcerated?    <input type="checkbox"/> YES    <input type="checkbox"/> NO</p> |

|                                                                          |                                                    |                                         |                                                                          |
|--------------------------------------------------------------------------|----------------------------------------------------|-----------------------------------------|--------------------------------------------------------------------------|
| 22. Have you ever suffered of tuberculosis?                              | <input type="checkbox"/> Does not know<br>Go to 24 | <input type="checkbox"/> NO<br>Go to 24 | <input type="checkbox"/> yes<br>Answer question 23                       |
| 23. How long have you suffered of tuberculosis? (in months)              | _____ months                                       | <input type="checkbox"/> Does not know  | <input type="checkbox"/> He does not remember                            |
| 24. Have you taken treatment for tuberculosis at some time in your life? | <input type="checkbox"/> NO                        | <input type="checkbox"/> yes            | <b>Which medications did you take?</b>                                   |
| 25. With how many people do you share your cell?                         | <input type="text"/> Number                        | <input type="checkbox"/> Does not know  |                                                                          |
| 26. Have you been tested for HIV/AIDS?                                   | <input type="checkbox"/> Does not know<br>Go to 29 | <input type="checkbox"/> NO<br>Go to 29 | <input type="checkbox"/> yes<br>Answer questions 27 and 28               |
| 27. What was the result of the HIV/AIDS test?                            | <input type="checkbox"/> Does not know             | <input type="checkbox"/> Neg            | <input type="checkbox"/> Pos                                             |
| 28. How long have you been tested for HIV/AIDS? (in months)              | _____ months                                       |                                         |                                                                          |
| 29. Are you currently taking treatment for HIV/AIDS?                     | <input type="checkbox"/> Does not know<br>Go to 31 | <input type="checkbox"/> NO<br>Go to 31 | <input type="checkbox"/> yes<br>Answer question 30                       |
| 30. Have you interrupted the current HIV treatment?                      | <input type="checkbox"/> NO                        | <input type="checkbox"/> yes            | How long ago did you interrupt the treatment? (month year): _____ months |

|                                       |                              |                             |
|---------------------------------------|------------------------------|-----------------------------|
| 31. Diagnosis of Respiratory Symptom: | <input type="checkbox"/> YES | <input type="checkbox"/> NO |
|---------------------------------------|------------------------------|-----------------------------|

## 3. Tuberculin Skin TEST (TST)

(If there are no risk factors and the inmate has been incarcerated for 3 months or more, the test will be applied.) To get the number of months, add the answers to questions 9, 10 and 11). If there is evidence of HIV or another risk factor for immunosuppression, the test is applied to the inmate, regardless of the inmate's detention time.

|                                              |                                          |
|----------------------------------------------|------------------------------------------|
| A. TST application date (day/month/year):    | Name of the person who applied the test: |
| B. Date of reading the TST (day/month/year): | Name of who did the reading test:        |
| <b>TST result:</b> Diameter (mm): _____      |                                          |

# (Supplementary file 2)

## Research project

### Determination of the Status of Tuberculosis in La Esperanza prison in Guaduas municipality, (Cundinamarca - Colombia)

CONFIDENTIALITY: The data provided to the National University of Colombia - Bogotá Headquarter, are confidential and may not be used for commercial purposes, taxation or judicial investigation.

#### Questionnaire 2. Clinical evaluation of inmates with respiratory symptoms

| 1. Inmate identification    |                          |                                               |                          |
|-----------------------------|--------------------------|-----------------------------------------------|--------------------------|
| Inmate ID number in study:  |                          | Date of clinical evaluation (day/month/year): |                          |
| Inmate complete name:       |                          | Jail ID number::                              |                          |
| 3. Identification document: | <input type="checkbox"/> | <input type="checkbox"/>                      | <input type="checkbox"/> |
|                             | (No ID)                  | (Colombian ID)                                | (ID of another country)  |
| ID number: _____            |                          |                                               |                          |

| 2. Tuberculosis risk factor assesment                                     |                                         |                                          |                                                                                                                       |                                   |                                    |
|---------------------------------------------------------------------------|-----------------------------------------|------------------------------------------|-----------------------------------------------------------------------------------------------------------------------|-----------------------------------|------------------------------------|
| 1. Have you been tested for tuberculin skin test?                         | <input type="checkbox"/> Does not know  | <input type="checkbox"/> NO              | <input type="checkbox"/> yes                                                                                          |                                   |                                    |
| 2. Have you had or do you have cancer?                                    | <input type="checkbox"/> Does not know  | <input type="checkbox"/> NO              | <input type="checkbox"/> yes                                                                                          | Organ                             | Time of evolution (months)         |
| 3. Have you had any organ transplant?                                     | <input type="checkbox"/> Does not know  | <input type="checkbox"/> NO              | <input type="checkbox"/> yes                                                                                          | Organ                             | Date (day/month/year)              |
| 4. Do you have diabetes Mellitus?                                         | <input type="checkbox"/> Does not know  | <input type="checkbox"/> NO              | <input type="checkbox"/> yes                                                                                          | Type I                            | Type II                            |
| 5. Have you had rheumatoid arthritis?                                     | <input type="checkbox"/> Does not know  | <input type="checkbox"/> NO              | <input type="checkbox"/> yes                                                                                          | Time of evolution (months)        |                                    |
| 6. Have you had LUPUS?                                                    | <input type="checkbox"/> Does not know  | <input type="checkbox"/> NO              | <input type="checkbox"/> yes                                                                                          | Time of evolution (months)        |                                    |
| 7. Have you had a gastrectomy?                                            | <input type="checkbox"/> Does not know  | <input type="checkbox"/> NO              | <input type="checkbox"/> yes                                                                                          | Date (day/month/year)             |                                    |
| 8. Have you had or do you have pneumonia?                                 | <input type="checkbox"/> Does not know  | <input type="checkbox"/> NO              | <input type="checkbox"/> yes                                                                                          |                                   |                                    |
| 9. Do you consume or have you used psychoactive substances?               | <input type="checkbox"/> NO<br>Go to 10 | <input type="checkbox"/> yes             | <b>What drugs do you use?</b>                                                                                         |                                   |                                    |
|                                                                           |                                         |                                          | <input type="checkbox"/> Marihuana                                                                                    | <input type="checkbox"/> Heroine  | <input type="checkbox"/> Bazuco    |
|                                                                           |                                         |                                          | <input type="checkbox"/> Cocaine                                                                                      | <input type="checkbox"/> Pegantes | <input type="checkbox"/> Inhalants |
|                                                                           |                                         |                                          | <input type="checkbox"/> Other, Which? _____                                                                          |                                   |                                    |
|                                                                           |                                         |                                          | Consumption time (months) _____                                                                                       |                                   |                                    |
| 10. Do you smoke cigarettes or tobacco? (definition of smoking as inhale) | <input type="checkbox"/> NO<br>Go to 12 | <input type="checkbox"/> yes<br>Go to 11 | 11. How often do you smoke during the week? How many cigarettes did you smoke yesterday _____, in the last week _____ |                                   |                                    |
| 12. Do you drink alcoholic beverages?                                     | <input type="checkbox"/> NO<br>Go to 14 | <input type="checkbox"/> yes<br>Go to 13 | 13. ¿ How often do you consume alcoholic beverages during the week? _____                                             |                                   |                                    |
| 14. In the last 6 months have you taken any of these medications?         | Drugs for cancer?                       |                                          | <input type="checkbox"/> yes                                                                                          | <input type="checkbox"/> NO       |                                    |
|                                                                           | Antiretroviral for HIV                  |                                          | <input type="checkbox"/> yes                                                                                          | <input type="checkbox"/> NO       |                                    |
|                                                                           | Prednisolone                            |                                          | <input type="checkbox"/> yes                                                                                          | <input type="checkbox"/> NO       |                                    |

| 3. Clinical findings                                                               |    |     |                          |                  |    |     |                          |
|------------------------------------------------------------------------------------|----|-----|--------------------------|------------------|----|-----|--------------------------|
| 3.1 Symptoms related to the presence of TB and / or mycobacteriosis (check with X) |    |     |                          |                  |    |     |                          |
| Symptoms                                                                           | NO | YES | Time of evolution (days) | Symptoms         | NO | YES | Time of evolution (days) |
| Fever                                                                              |    |     |                          | Hemoptysis       |    |     |                          |
| Cough                                                                              |    |     |                          | Headache         |    |     |                          |
| Expectoration                                                                      |    |     |                          | Abdominal pain   |    |     |                          |
| Weight loss                                                                        |    |     |                          | Diarrhea         |    |     |                          |
| Night sweats                                                                       |    |     |                          | Loss of appetite |    |     |                          |

|                            |  |  |  |                           |  |  |  |
|----------------------------|--|--|--|---------------------------|--|--|--|
| Adynamia and Asthenia      |  |  |  | Chest pain                |  |  |  |
| Hematuria                  |  |  |  | Shaking chills            |  |  |  |
| Other respiratory symptoms |  |  |  | Time of evolution (days): |  |  |  |
|                            |  |  |  | Time of evolution (days): |  |  |  |
|                            |  |  |  | Time of evolution (days): |  |  |  |

### 3.2 Physical exam

|                                                                       |                              |                              |                                                 |  |
|-----------------------------------------------------------------------|------------------------------|------------------------------|-------------------------------------------------|--|
| <b>BCG scar</b><br>(look at the patient)                              | <input type="checkbox"/> yes | <input type="checkbox"/> NO  | Axillary temperature<br>(In degrees centigrade) |  |
| <b>Weight</b><br>(kg)                                                 |                              |                              | Blood pressure                                  |  |
| Height<br>(In centimeters)                                            |                              |                              | Breathing frequency<br>(breaths per minute)     |  |
| Heart rate (Beats / min)                                              |                              |                              |                                                 |  |
| Signs of respiratory distress<br>(tachypnea, runs, cyanosis, etc ...) | <input type="checkbox"/> NO  | <input type="checkbox"/> yes | <b>Which?</b>                                   |  |
| Pulmonary aggregates (Roncus,<br>wheezing, rales)                     | <input type="checkbox"/> NO  | <input type="checkbox"/> yes | <b>Which?</b>                                   |  |
| Adenopathies (cervical, inguinal,<br>axillary, etc ...)               | <input type="checkbox"/> NO  | <input type="checkbox"/> yes | <b>Which?</b>                                   |  |

### 3.3 Clinical diagnoses

Name of the doctor: \_\_\_\_\_

Doctor's signature \_\_\_\_\_
